# Supplementary material for: A Pipeline to Investigate Fungal–Fungal Interactions: Trichoderma Isolates against Plant-Associated Fungi
Source: MDPI journal article supplement (doi:10.3390/jof9040461), 2023-04-10
Supplement: s1 [file s1]

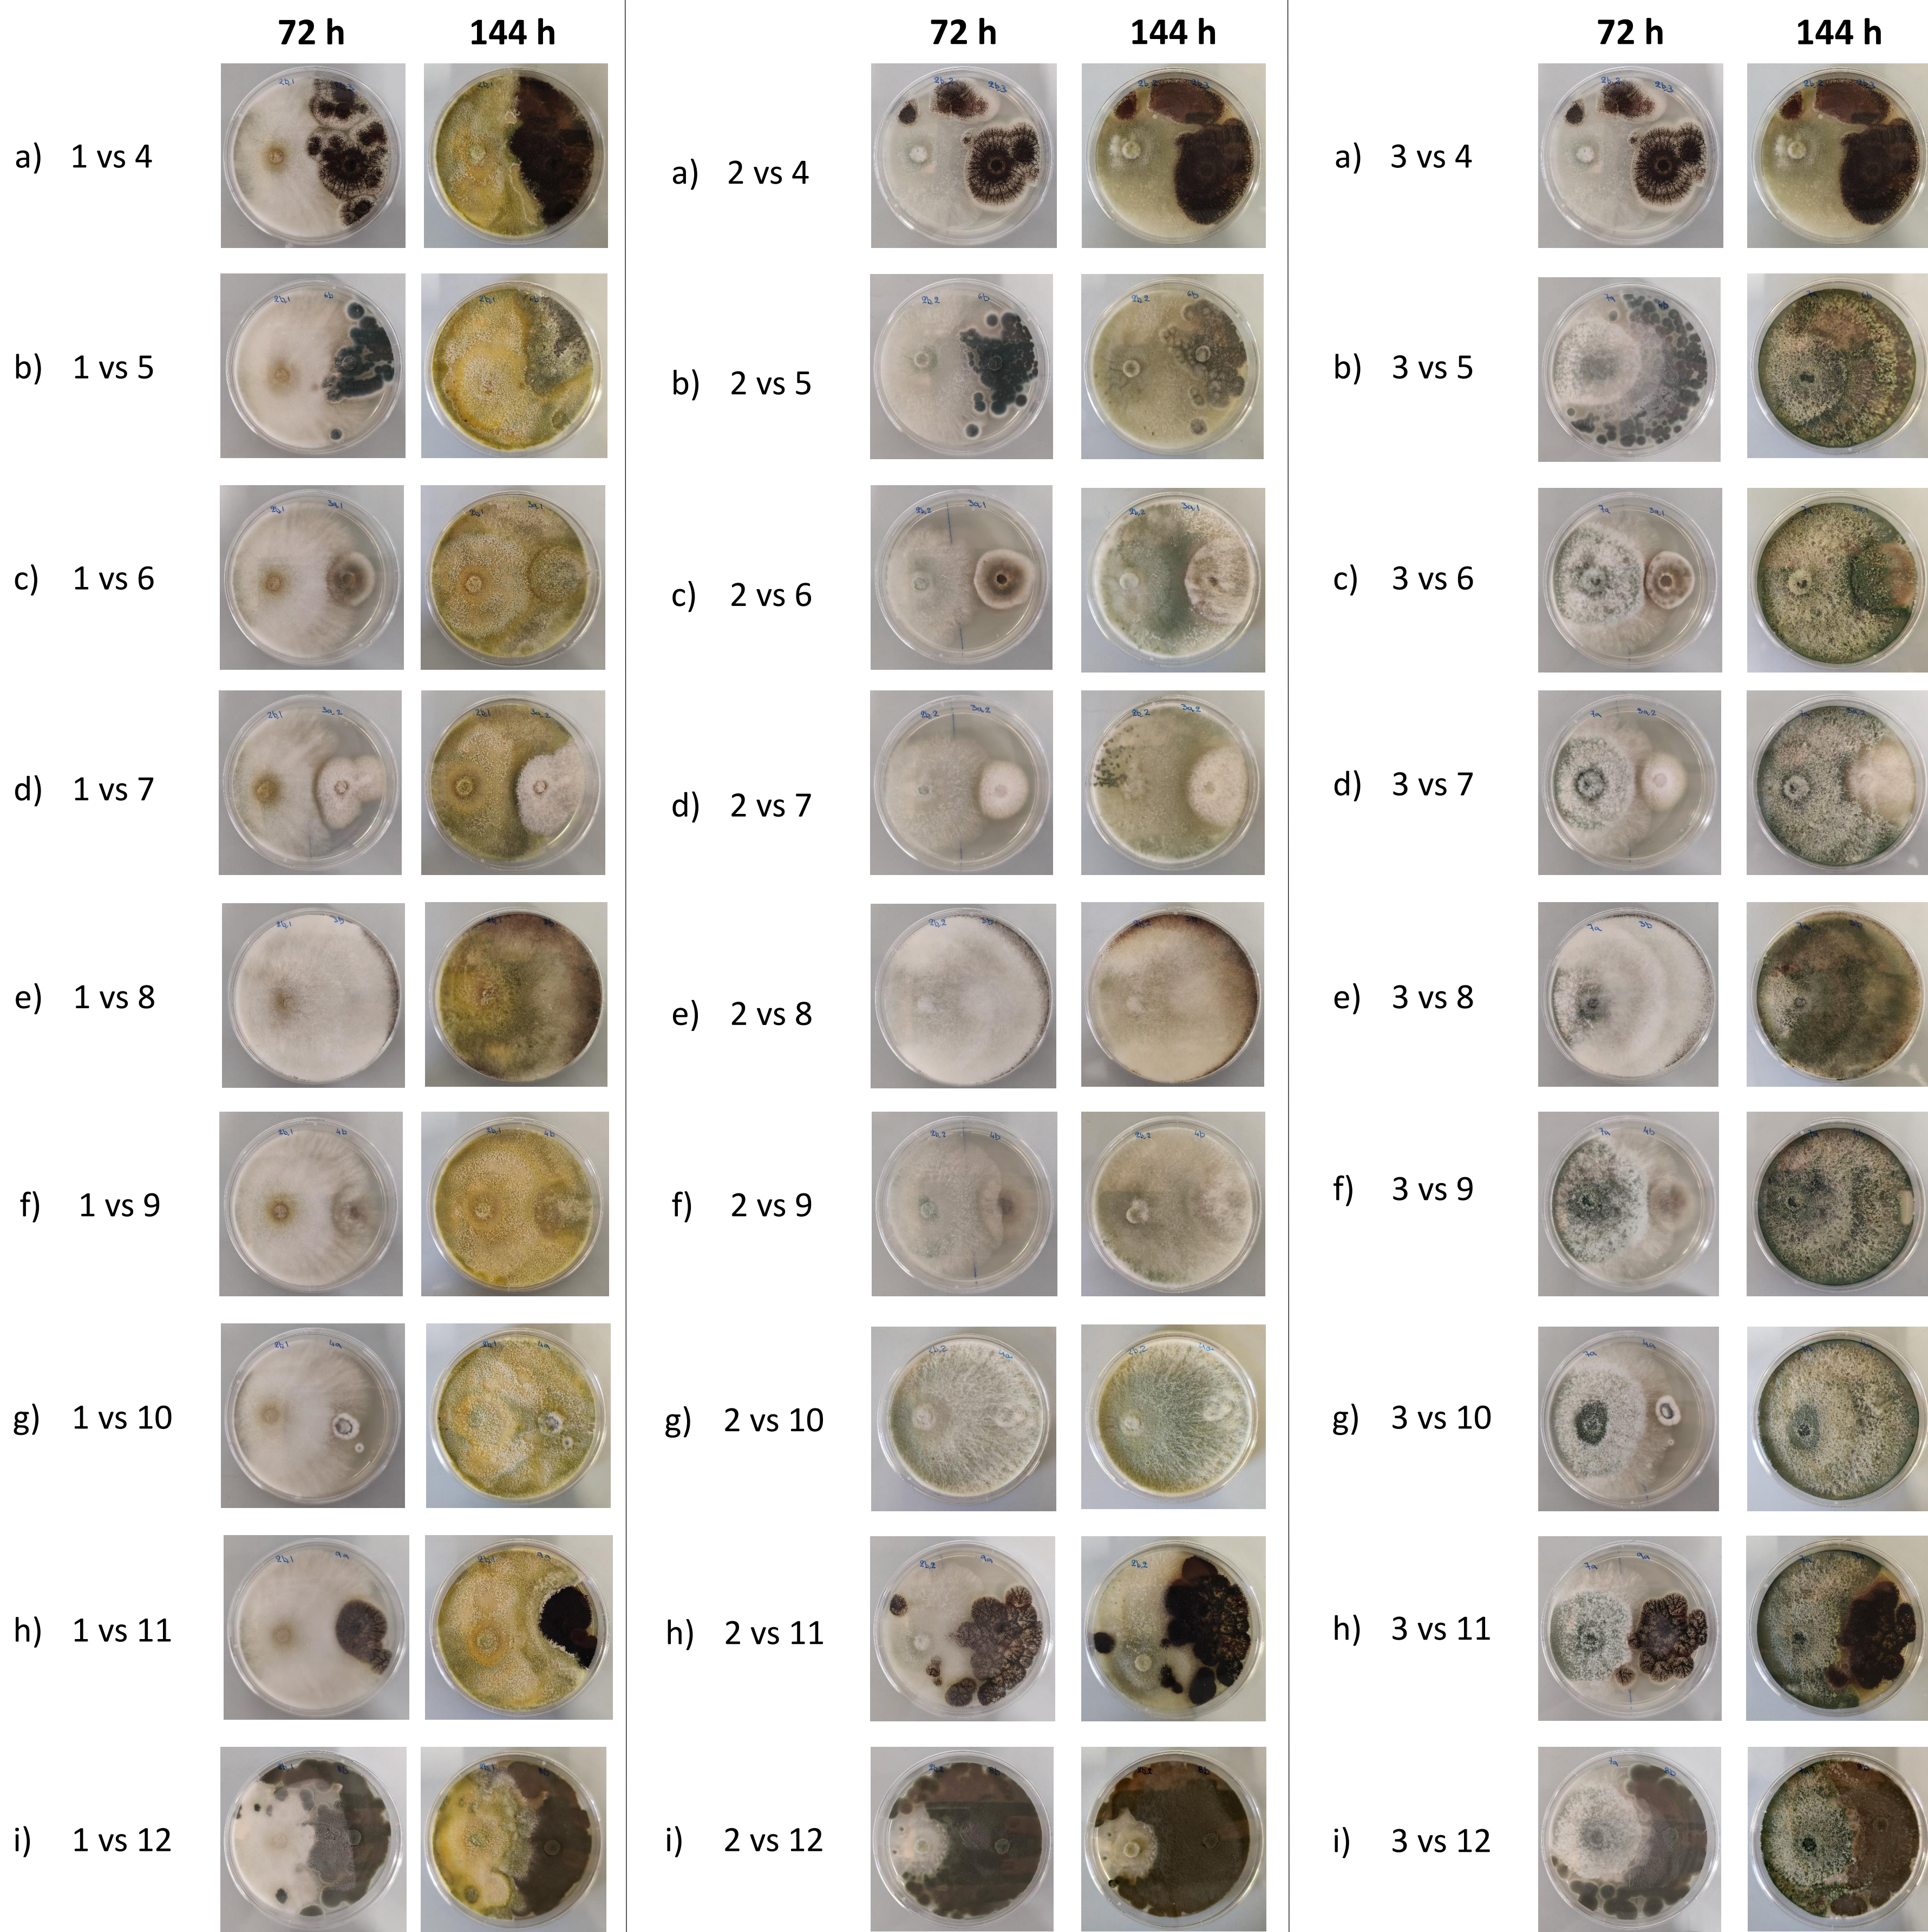

**Figure S1.** Dual nucleation dynamics of the three *Trichoderma* strains against the nine plant-associated fungi. Fungal cultures were performed in Petri dishes on a PDA medium. Pictures were taken 72 and 144 h post-cultivation.

**Fungal strains:** **1:** *Trichoderma simmonsii* EXF-17015; **2:** *Trichoderma* sp. EXF-17016; **3:** *Trichoderma* sp. EXF-17020; **4:** *Aspergillus aculeatus* EXF-17023; **5:** *Penicillium* sp. EXF-17021; **6:** *Alternaria* sp. EXF-17017; **7:** *Fusarium ramigenum* EXF-17018; **8:** *Rhizopus arrhizus* EXF-17019; **9:** *Botrytis caroliniana* EXF-17025; **10:** *Penicillium copticola* EXF-17026; **11:** *Aspergillus piperis* EXF-17024; **12:** *Penicillium oxalicum* EXF-17022
