# Supplementary material for: A Pipeline to Investigate Fungal–Fungal Interactions: Trichoderma Isolates against Plant-Associated Fungi
Source: J Fungi (Basel). 2023 Apr 10;9(4):461. doi: 10.3390/jof9040461 (PMC10142788; doi:10.3390/jof9040461)
Supplement: Supplementary file 1 [file jof-09-00461-s001.zip]

Archive with 14 entries (14 files):
- jof-2223311-supplementary/Caption Videos.pdf
- jof-2223311-supplementary/Fig. S1.pdf
- jof-2223311-supplementary/V1_T. simmonsii.mp4
- jof-2223311-supplementary/V10_3 vs 8.mp4
- jof-2223311-supplementary/V11_3 vs 7.mp4
- jof-2223311-supplementary/V12_2 vs 9.mp4
- jof-2223311-supplementary/V2_Trichoderma sp. 2.mp4
- jof-2223311-supplementary/V3_Trichoderma sp. 3.mp4
- jof-2223311-supplementary/V4_1 vs 1.mp4
- jof-2223311-supplementary/V5_2 vs 2.mp4
- jof-2223311-supplementary/V6_3 vs 3.mp4
- jof-2223311-supplementary/V7_1 vs 2.mp4
- jof-2223311-supplementary/V8_2 vs 3.mp4
- jof-2223311-supplementary/V9_1 vs 3.mp4
